# Supplementary material
Source: PubMed Central journal article supplement (PMC6519914)

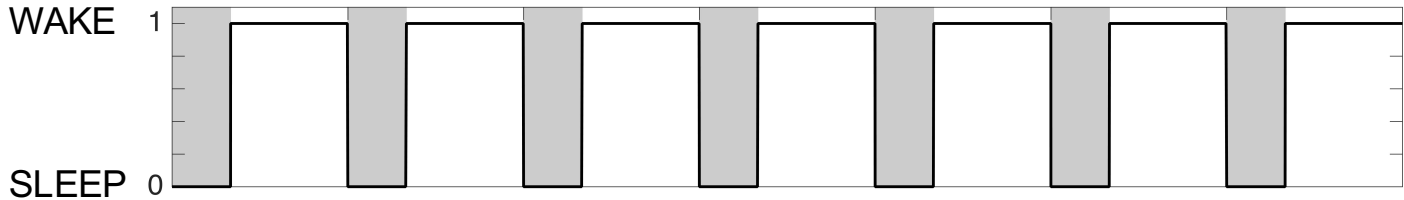

$IS_{SW} = 100\%$

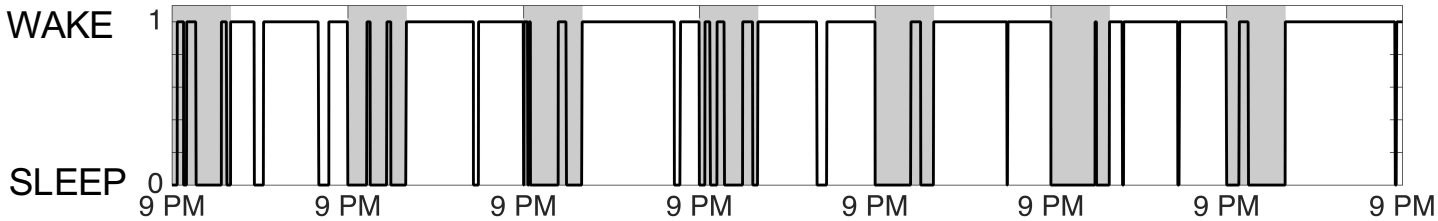

$IS_{SW} = 74\%$

Time (hr)

Supplement: zsz034_suppl_supplementary_figure_s1.pdf [file zsz034_suppl_supplementary_figure_s1.pdf]

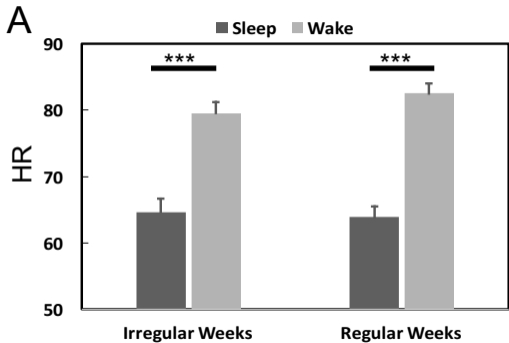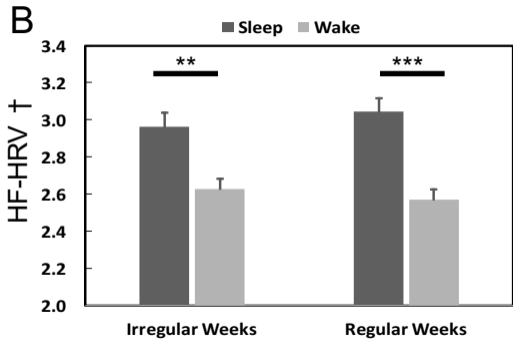

Supplement: zsz034_suppl_supplementary_figure_s2.pdf [file zsz034_suppl_supplementary_figure_s2.pdf]
